# Supplementary material for: A transition-metal-free, one-pot procedure for the synthesis of α,β-epoxy ketones by oxidative coupling of alkenes and aldehydes via base catalysis
Source: Royal Society of Chemistry journal article supplement (doi:10.1039/c4cc09260k), 2014-11-27

## Supporting Information

# A Metal-Free, One-Pot Procedure for the Synthesis of $\alpha,\beta$ -Epoxy Ketones by Oxidative Coupling of Alkenes and Aldehydes with Base Catalysis

Qingping Ke,<sup>a,b</sup> Bingyan Zhang,<sup>b</sup> Bolun Hu,<sup>b</sup> Yangxin Jin<sup>b</sup> and Guanzhong Lu<sup>a\*</sup>

<sup>a)</sup> Key Laboratory for Advanced Materials and Research Institute of Industrial Catalysis  
East China University of Science and Technology, Shanghai 200237, P. R. China. Fax: +86 21 6425 3703; E-mail: gzhlu@ecust.edu.cn

<sup>b)</sup> College of Chemistry and Materials Engineering, Wenzhou University, Zhejiang 325000, P. R. China.

## S1. Experimental Section

**1. General.** All the reagents were of analytical grade and used as received without further purification. N,N-dimethylformamide (DMF), acetonitrile (MeCN) and dimethyl sulfoxide (DMSO) were purchased from Amethyst Chemicals. Other reagents were obtained from Shanghai Chemical Reagents. Silica gel plates were used for thin-layer chromatography (TLC) and compounds were visualized using UV light. Solvents were distilled prior to use.

**2. Reaction procedure.** The catalyst (0.1 mmol), MeCN (2 mL), TBHP (70% in water, 1 mmol), styrene (0.5 mmol) and benzaldehyde (1 mmol) were all introduced into the reactor. A typical reaction mixture consisted of K<sub>2</sub>CO<sub>3</sub> (13.8 mg), MeCN (2 mL), TBHP (70% in water, 95  $\mu$ L), styrene (52  $\mu$ L) and 4-methyl benzaldehyde (120  $\mu$ L). The mixture was stirred at 100 °C for 12–24 h, after which H<sub>2</sub>O (5 mL) and CH<sub>2</sub>Cl<sub>2</sub> (5 mL) were added, the phases were separated and the organic layer was washed with water (2 $\times$ 5 mL). The organic phase was subsequently evaporated under reduced pressure to give the crude product. The GC yields were determined using an Agilent 7890 equipped with an HP-5 column (30 m  $\times$  0.25 mm). The product was purified by column chromatography on silica gel (50:1 petroleum ether/ethyl acetate).

**3. Characterization.** <sup>1</sup>H (500 MHz) and <sup>13</sup>C NMR (125 MHz) spectra were recorded at 20 °C using CDCl<sub>3</sub> as the solvent. Chemical shifts are given in parts per million relative to TMS as the internal standard.

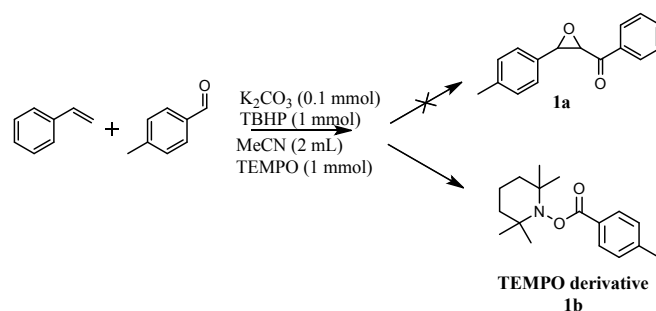

**Scheme S1.** Effect of adding TEMPO on the oxidative coupling reaction.

**Table S1.** Role of K<sub>2</sub>CO<sub>3</sub> in the oxidative coupling reaction.

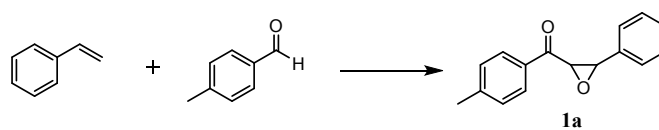

| Entry          | Additive                              | Yield (%) |
|----------------|---------------------------------------|-----------|
| 1              | K <sub>2</sub> CO <sub>3</sub>        | 46        |
| 2              | K <sub>2</sub> CO <sub>3</sub> , TBHP | 90        |
| 3              | TBHP                                  | 0         |
| 4 <sup>a</sup> | -                                     | 0         |

Reaction conditions: aldehyde substrate (1 mmol), styrene (0.5 mmol), TBHP (1 mmol), and MeCN (2 mL) under air at 100 °C for 12 h. Isolated yield. This coupling reaction was performed in MeCN solvent (N<sub>2</sub> degassed).

## S2. NMR data

### (1) (3-(4-fluorophenyl)oxiran-2-yl)(p-tolyl)methanone

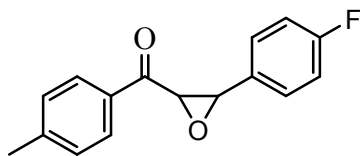

**<sup>1</sup>H NMR** (500 MHz, CDCl<sub>3</sub>) δ 7.91 (d, *J* = 8.0 Hz, 2H), 7.38 – 7.32 (m, 2H), 7.29 (d, *J* = 7.9 Hz, 2H), 7.10 (t, *J* = 8.5 Hz, 2H), 4.24 (s, 1H), 4.06 (s, 1H), 2.43 (s, 3H). **<sup>13</sup>C NMR** (125 MHz, CDCl<sub>3</sub>) δ 192.44 (s), 164.17 (s), 145.17 (s), 133.02 (s), 131.41 (s), 129.61 (s), 128.49 (s), 127.58 (d, *J* = 8.4 Hz), 115.94 (s), 115.76 (s), 60.89 (s), 58.70 (s), 21.79 (s).

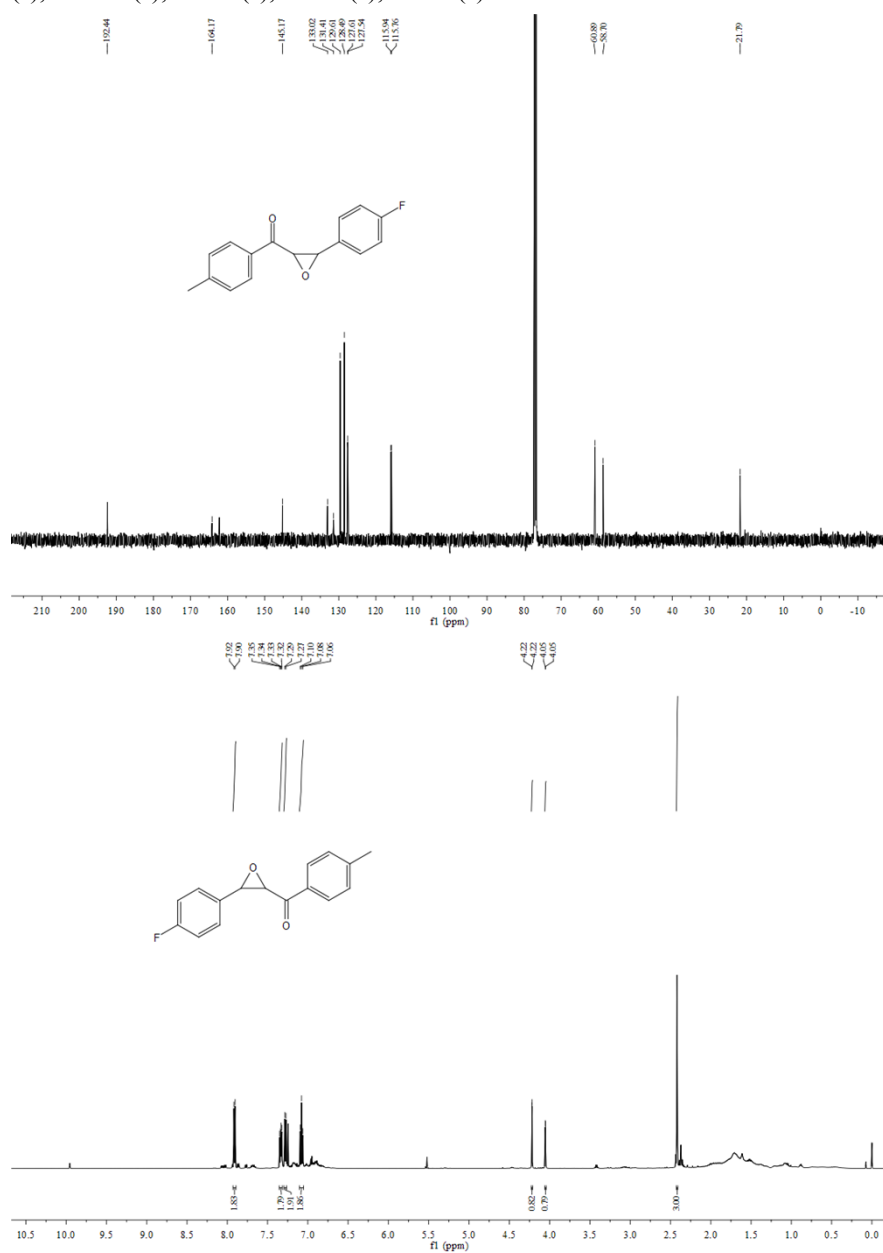

(2) (3-(4-chlorophenyl)oxiran-2-yl)(p-tolyl)methanone

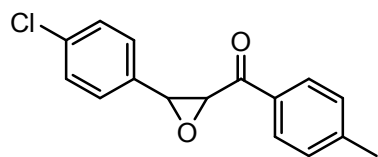

**<sup>13</sup>C NMR** (125 MHz, CDCl<sub>3</sub>) δ 192.26 (s), 145.23 (s), 134.92 (s), 134.20 (s), 132.98 (s), 129.62 (s), 129.03 (s), 128.49 (s), 127.13 (s), 60.87 (s), 58.60 (s), 21.79 (s). **<sup>1</sup>H NMR** (500 MHz, CDCl<sub>3</sub>) δ 7.83 (d, 2H), 7.31 (d, *J* = 8.5 Hz, 2H), 7.23 (dd, *J* = 8.4, 6.8 Hz, 4H), 4.16 (d, *J* = 1.9 Hz, 1H), 3.98 (d, *J* = 1.8 Hz, 1H), 2.36 (s, 3H).

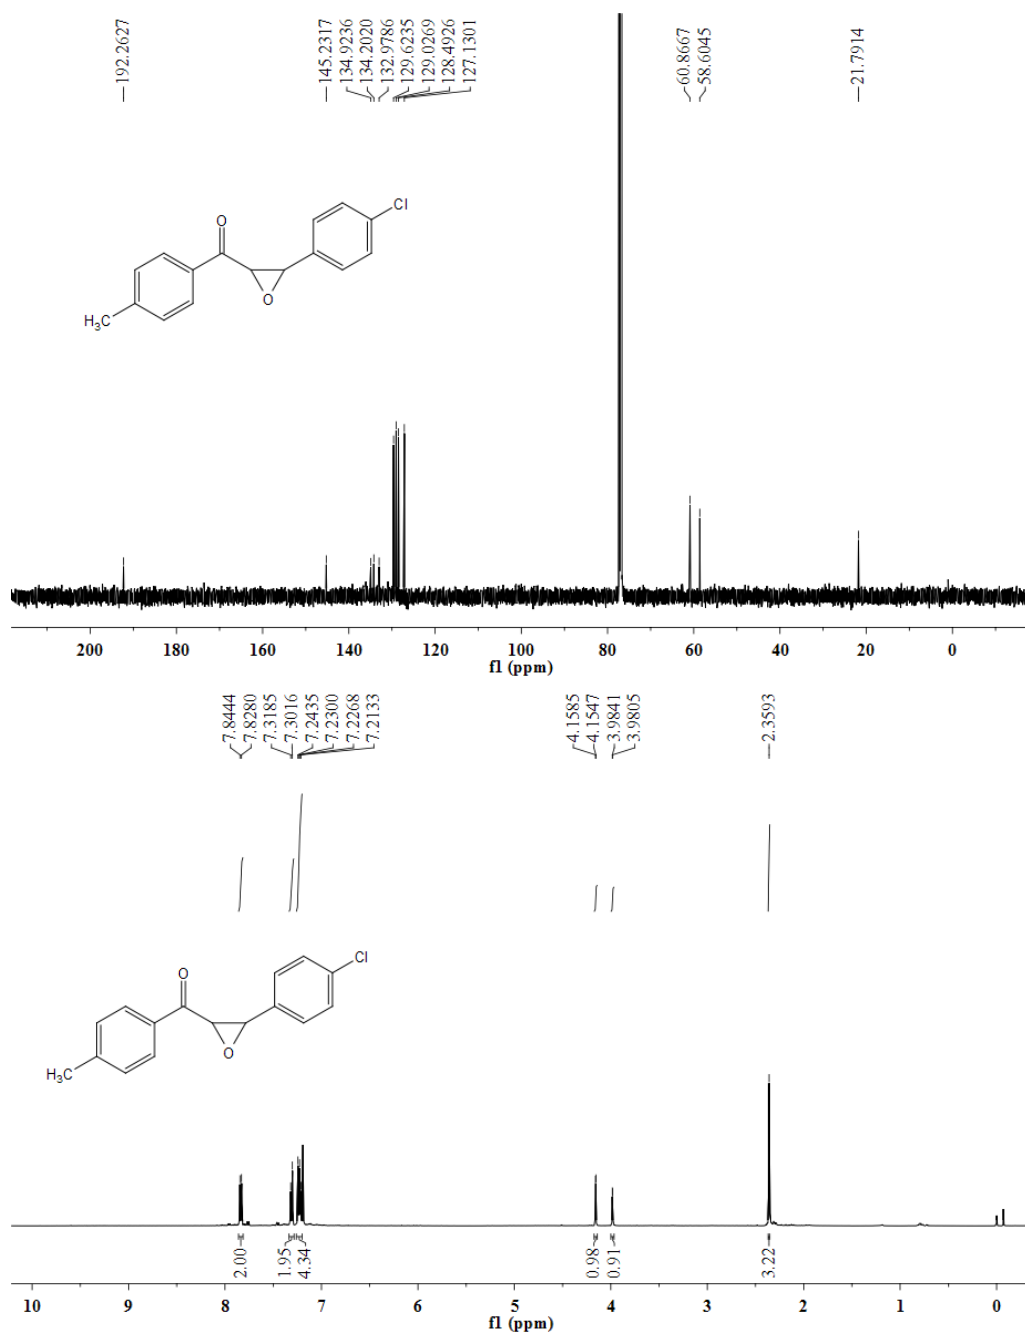

(3) (3-(4-bromophenyl)oxiran-2-yl)(p-tolyl)methanone

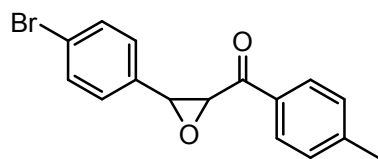

**$^{13}\text{C}$  NMR** (125 MHz,  $\text{CDCl}_3$ )  $\delta$  192.20 (s), 145.21 (s), 134.76 (s), 133.00 (s), 131.97 (s), 129.61 (s), 128.49 (s), 127.41 (s), 123.02 (s), 60.83 (s), 58.62 (s), 21.77 (s).  **$^1\text{H}$  NMR** (500 MHz,  $\text{CDCl}_3$ )  $\delta$  7.90 (d,  $J = 8.2$  Hz, 2H), 7.53 (d,  $J = 8.4$  Hz, 2H), 7.29 (d,  $J = 8.0$  Hz, 2H), 7.24 (d,  $J = 8.4$  Hz, 2H), 4.22 (d,  $J = 1.8$  Hz, 1H), 4.04 (d,  $J = 1.7$  Hz, 1H), 2.43 (s, 3H).

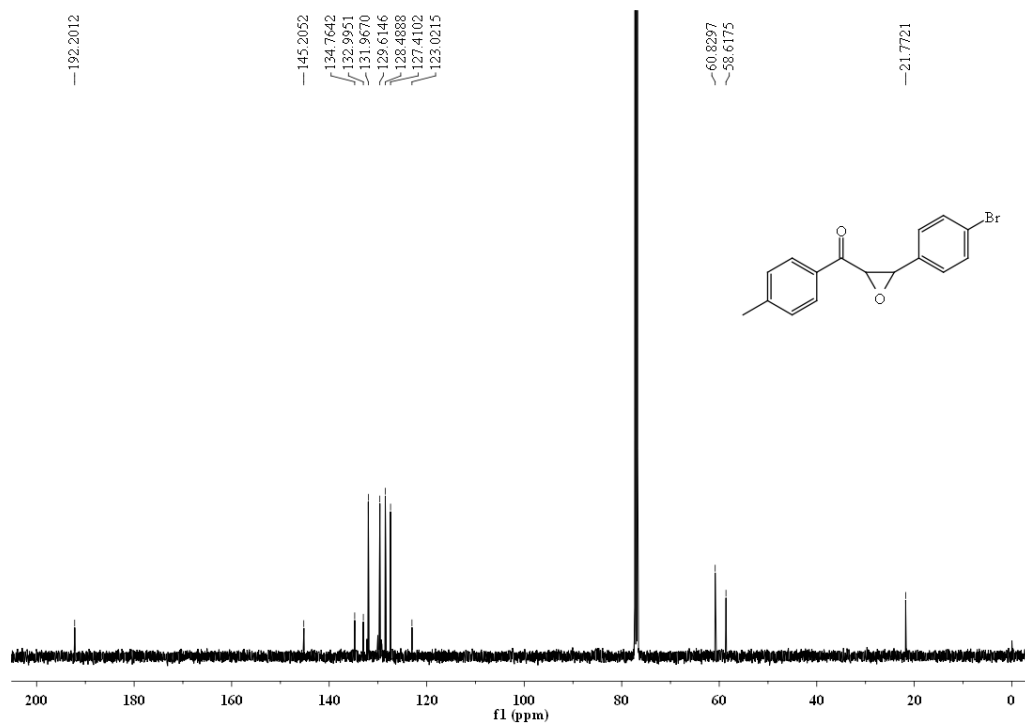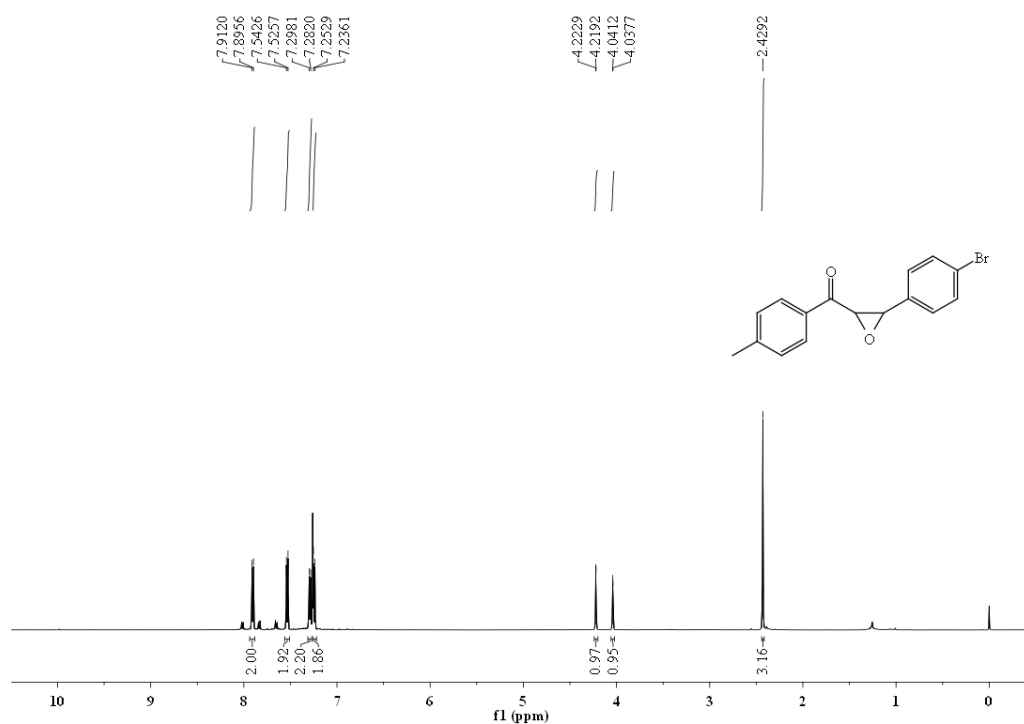

(4) (3-(3-bromophenyl)oxiran-2-yl)(p-tolyl)methanone

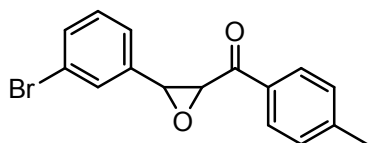

$^{13}\text{C}$  NMR (125 MHz,  $\text{CDCl}_3$ )  $\delta$  192.10 (s), 145.24 (s), 138.08 (s), 132.98 (s), 132.09 (s), 130.31 (s), 129.62 (s), 128.59 (d,  $J = 19.1$  Hz), 124.57 (s), 123.00 (s), 60.73 (s), 58.31 (s), 21.78 (s).  $^1\text{H}$  NMR (500 MHz,  $\text{CDCl}_3$ )  $\delta$  7.91 (d,  $J = 8.2$  Hz, 2H), 7.51 (dd,  $J = 4.0, 1.9$  Hz, 2H), 7.33 – 7.27 (m, 4H), 4.24 (d,  $J = 1.8$  Hz, 1H), 4.04 (d,  $J = 1.6$  Hz, 1H), 2.43 (s, 3H).

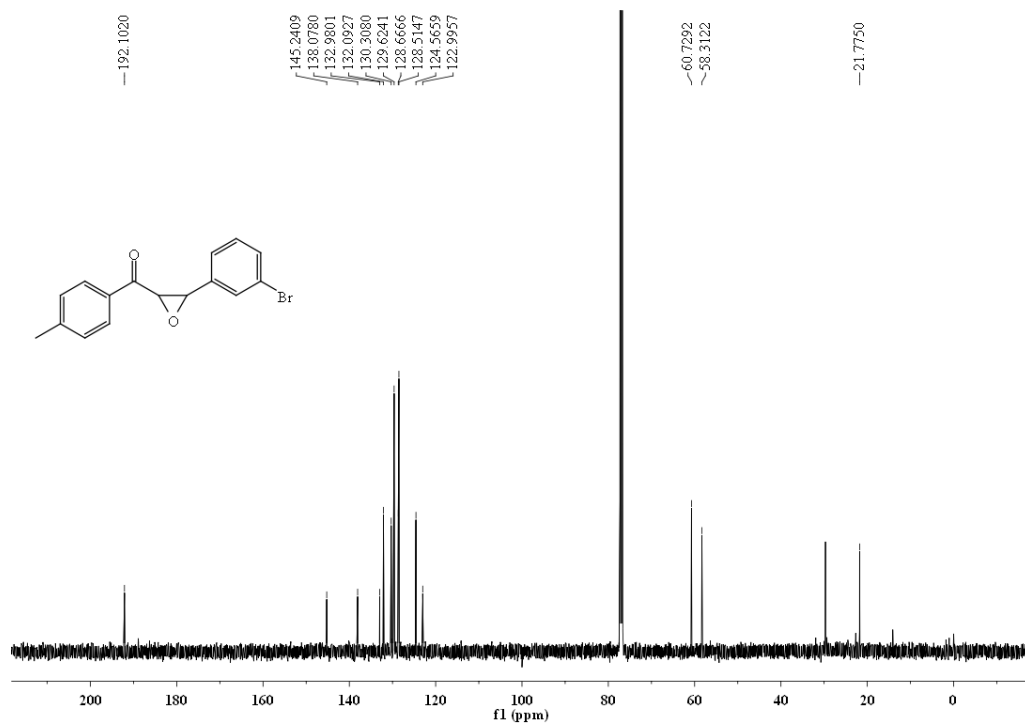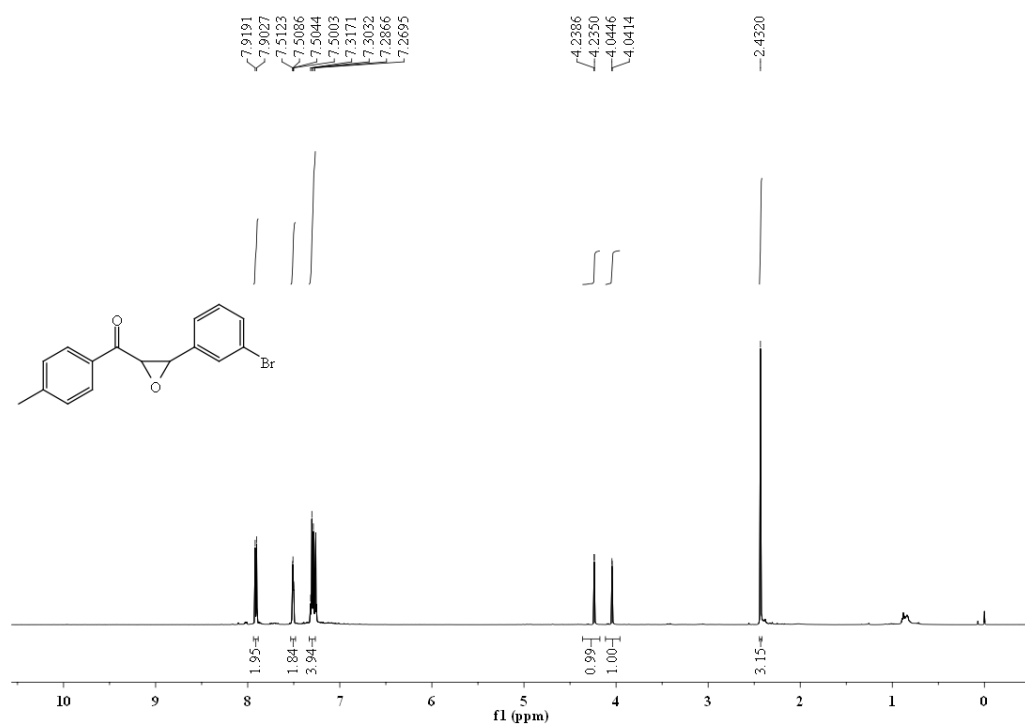

(5) (3-(2-bromophenyl)oxiran-2-yl)(p-tolyl)methanone

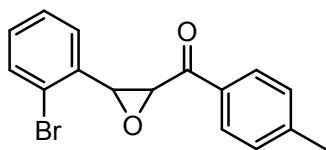

$^{13}\text{C}$  NMR (125 MHz,  $\text{CDCl}_3$ )  $\delta$  192.25 (s), 145.19 (s), 135.58 (s), 132.70 (d,  $J = 49.3$  Hz), 130.02 (s), 129.57 (s), 128.61 (d,  $J = 10.2$  Hz), 127.84 (s), 126.51 (s), 122.54 (s), 60.02 (s), 59.37 (s), 21.89 (s).  $^1\text{H}$  NMR (500 MHz,  $\text{CDCl}_3$ )  $\delta$  7.97 (d,  $J = 8.2$  Hz, 2H), 7.58 (dd,  $J = 8.0, 0.7$  Hz, 1H), 7.38 (dd,  $J = 8.7, 1.5$  Hz, 2H), 7.30 (d,  $J = 8.0$  Hz, 2H), 7.26 (s, 1H), 4.34 (d,  $J = 1.9$  Hz, 1H), 4.15 (d,  $J = 1.9$  Hz, 1H), 2.44 (s, 3H).

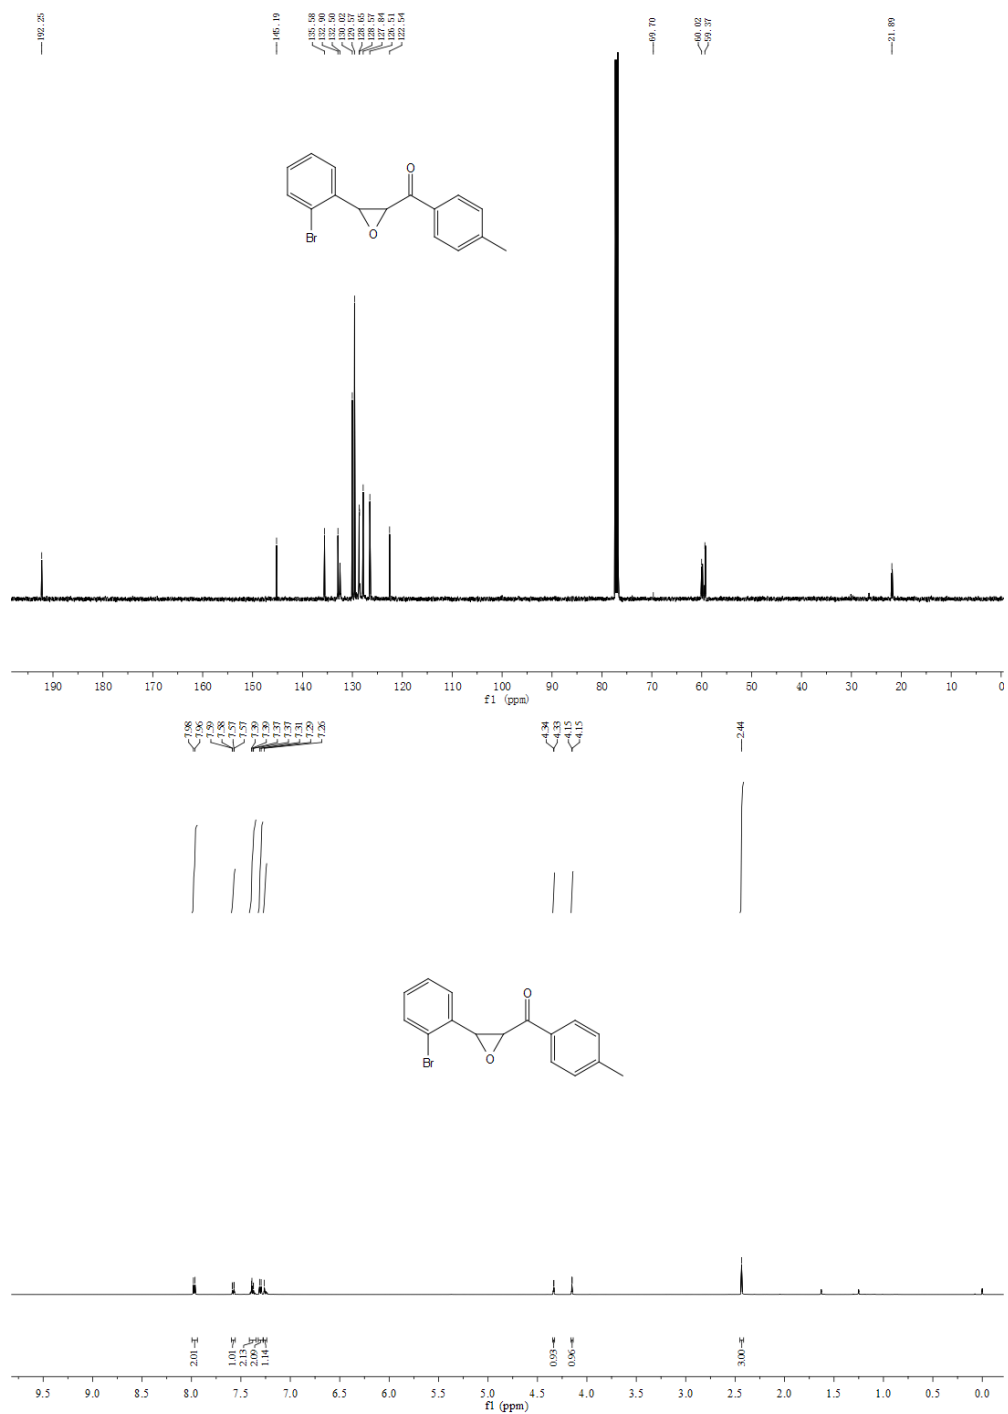

(6) (3-(2-chlorophenyl)oxiran-2-yl)(p-tolyl)methanone

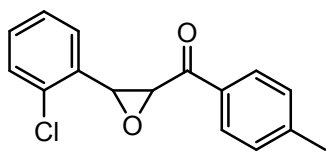

$^{13}\text{C}$  NMR (125 MHz,  $\text{CDCl}_3$ )  $\delta$  192.25 (s), 145.11 (s), 133.97 (s), 133.35 (s), 132.98 (s), 129.62 (d,  $J = 15.8$  Hz), 129.33 (s), 128.55 (s), 127.23 (s), 126.17 (s), 60.00 (s), 57.04 (s), 21.78 (s).  $^1\text{H}$  NMR (500 MHz,  $\text{CDCl}_3$ )  $\delta$  7.96 (d, 2H), 7.44 – 7.37 (m, 2H), 7.35 – 7.27 (m, 4H), 4.40 (d,  $J = 1.6$  Hz, 1H), 4.15 (d,  $J = 1.9$  Hz, 1H), 2.43 (s, 3H).

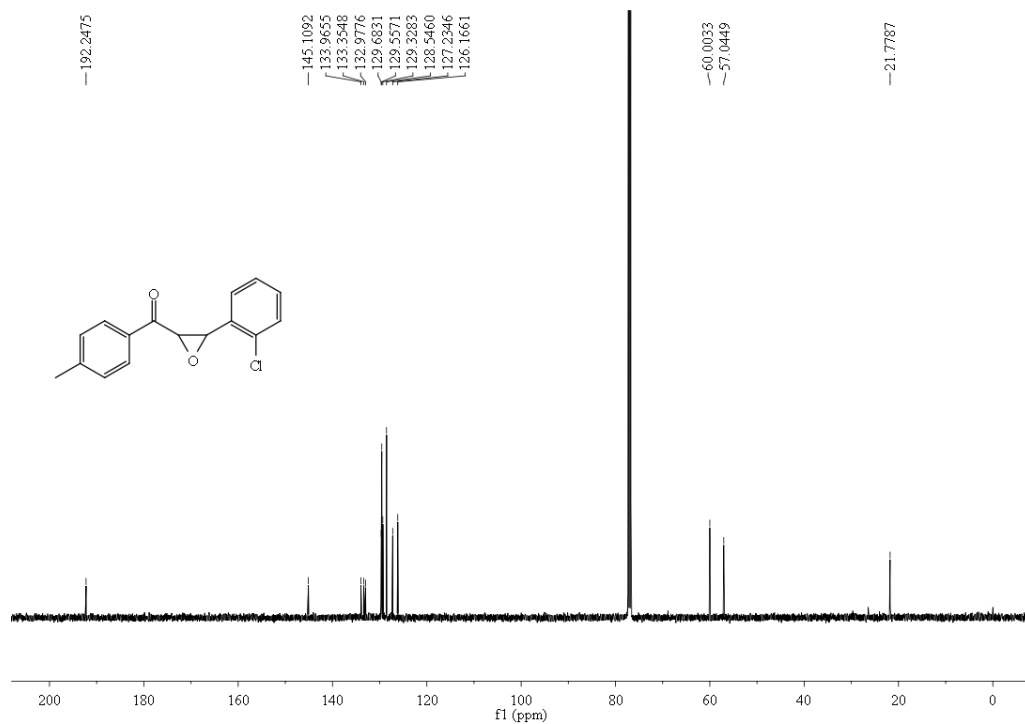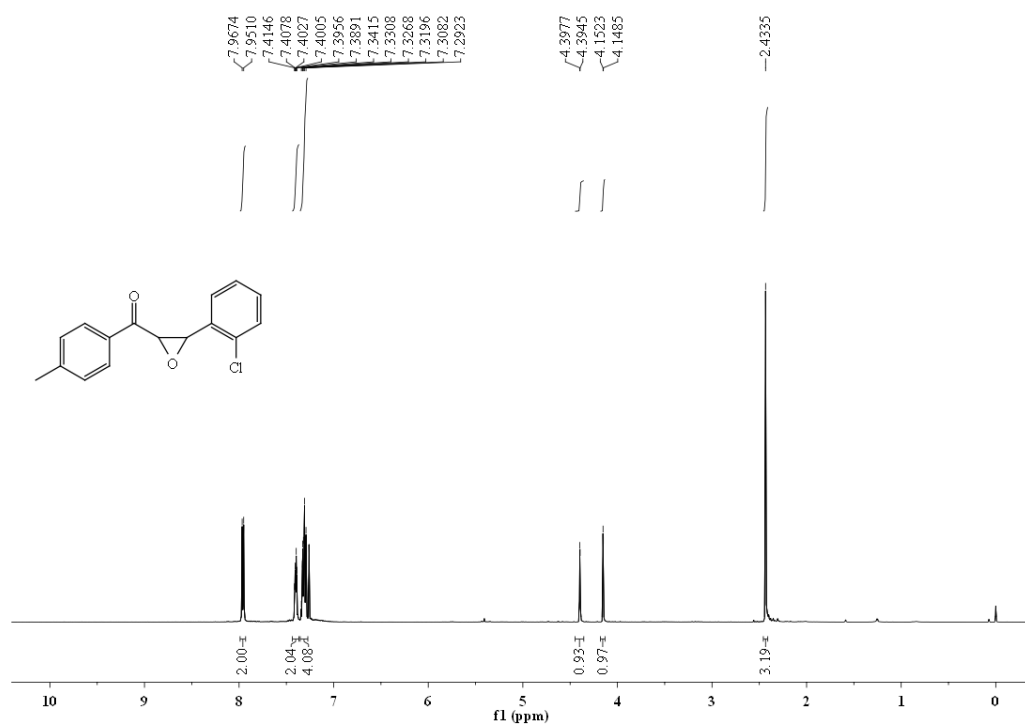



(7) (3-phenyloxiran-2-yl)(p-tolyl)methanone

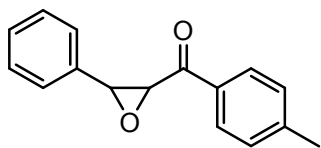

$^{13}\text{C}$  NMR (125 MHz,  $\text{CDCl}_3$ )  $\delta$  191.57 (s), 144.06 (s), 134.59 (s), 132.01 (s), 128.55 (s), 127.98 (s), 127.73 (s), 127.46 (s), 124.78 (s), 59.90 (s), 58.29 (s), 20.76 (s).  $^1\text{H}$  NMR (500 MHz,  $\text{CDCl}_3$ )  $\delta$  7.84 (d,  $J = 8.2$  Hz, 2H), 7.36 – 7.27 (m, 5H), 7.21 (d,  $J = 8.0$  Hz, 2H), 4.21 (d,  $J = 1.9$  Hz, 1H), 3.99 (d,  $J = 1.8$  Hz, 1H), 2.34 (d,  $J = 7.8$  Hz, 3H).

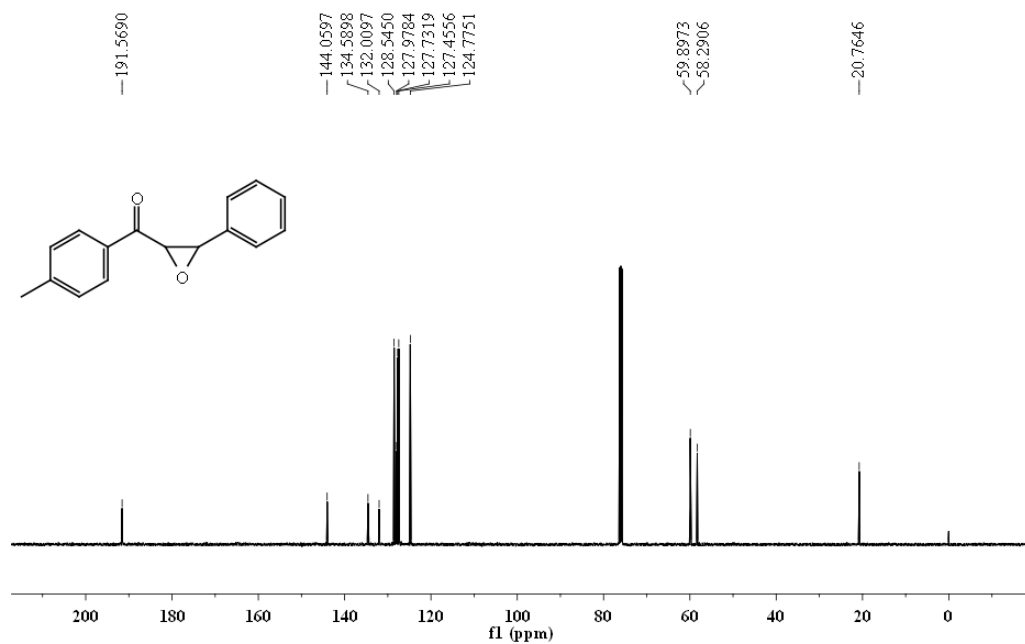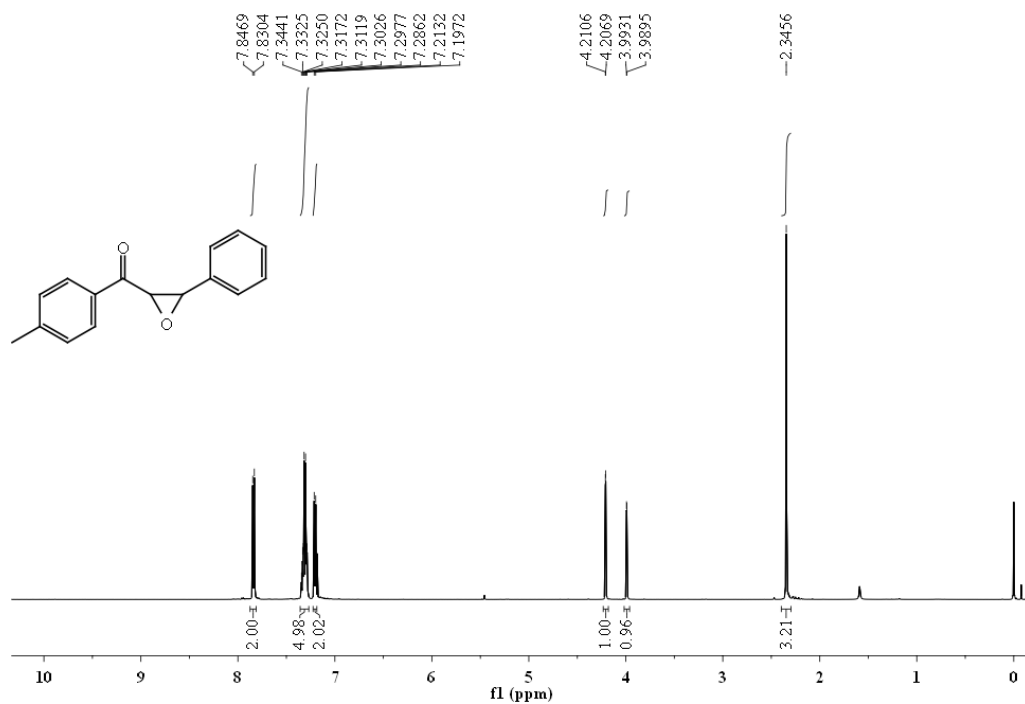

**(8) p-tolyl(3-p-tolylloxiran-2-yl)methanone**

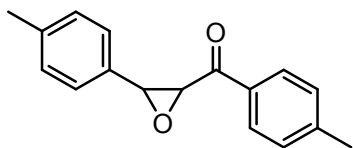

**$^{13}\text{C}$  NMR** (125 MHz,  $\text{CDCl}_3$ )  $\delta$  192.76, 145.06, 133.07, 132.59, 129.57, 129.47, 128.53, 128.44, 125.80, 60.92, 59.33, 21.78, 21.27.  **$^1\text{H}$  NMR** (500 MHz,  $\text{CDCl}_3$ )  $\delta$  7.91 (d,  $J$  = 8.2 Hz, 2H), 7.30 – 7.26 (m, 4H), 7.21 (d,  $J$  = 8.0 Hz, 2H), 4.28 (d,  $J$  = 1.9 Hz, 1H), 4.03 (d,  $J$  = 1.8 Hz, 1H), 2.42 (s, 3H), 2.38 (s, 3H).

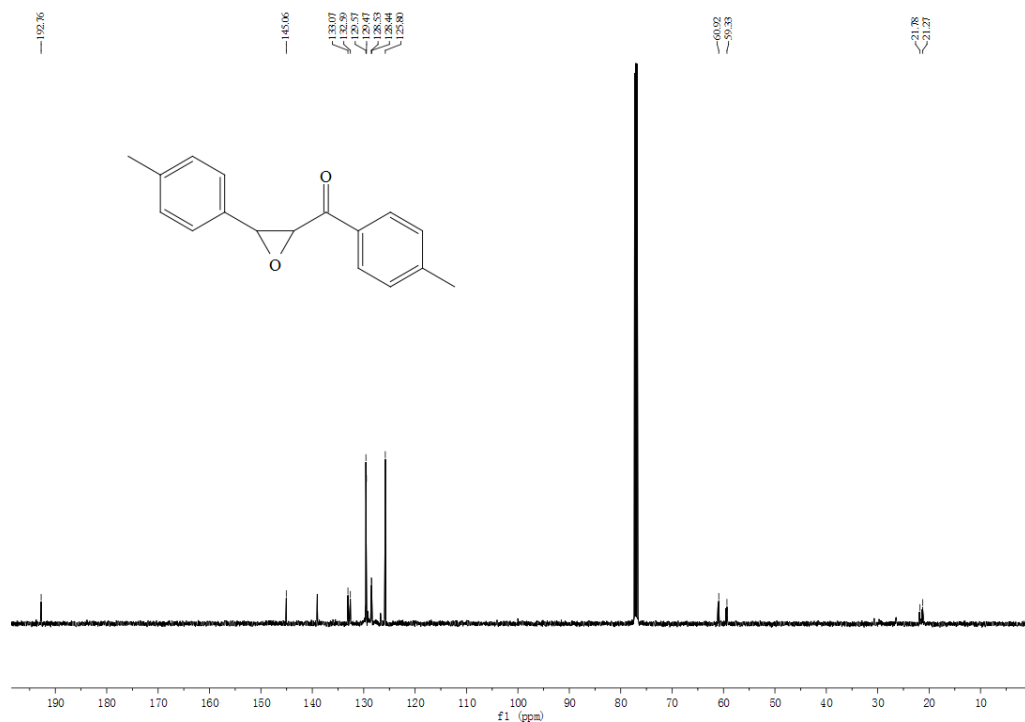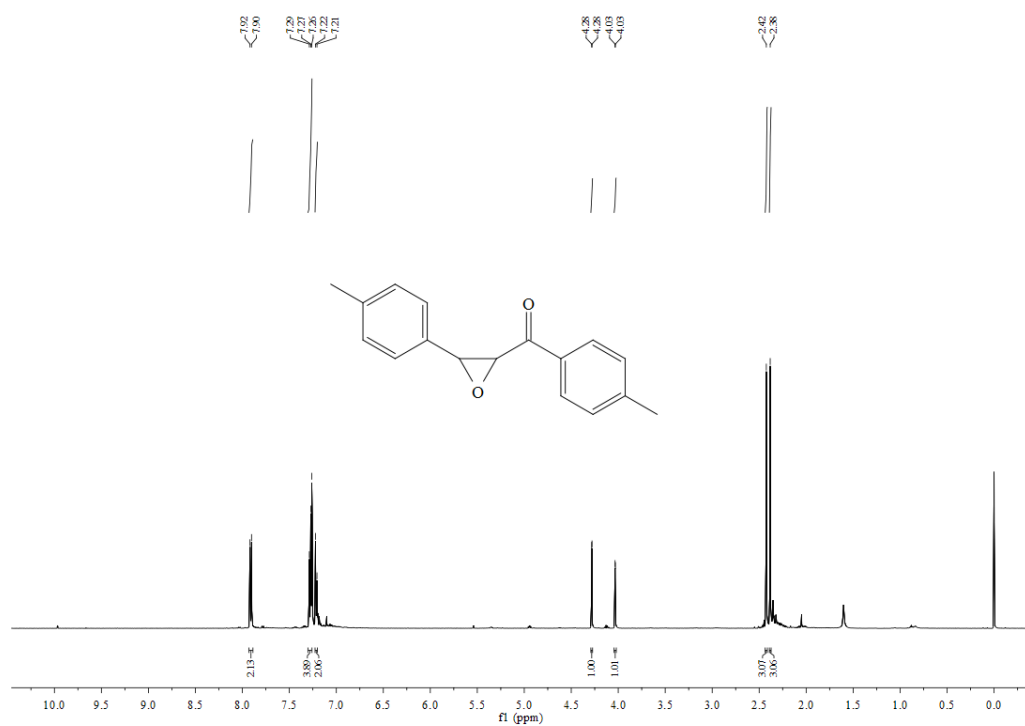

**(9) (3-methyl-3-phenyloxiran-2-yl)(p-tolyl)methanone**

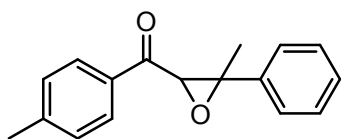

**$^{13}\text{C}$  NMR** (125 MHz,  $\text{CDCl}_3$ )  $\delta$  192.56 (s), 145.02 (s), 140.59 (s), 133.22 (s), 129.62 (s), 128.75 (s), 128.38 (s), 128.19 (s), 125.15 (s), 66.86 (s), 62.69 (s), 21.80 (s), 17.02 (s).  **$^1\text{H}$  NMR** (500 MHz,  $\text{CDCl}_3$ )  $\delta$  7.87 (d,  $J = 8.2$  Hz, 2H), 7.49 (d,  $J = 7.1$  Hz, 2H), 7.43 (t,  $J = 7.4$  Hz, 2H), 7.37 (t,  $J = 7.2$  Hz, 1H), 7.29 (d,  $J = 8.0$  Hz, 2H), 4.14 (s, 1H), 2.43 (s, 3H), 1.63 (s, 3H).

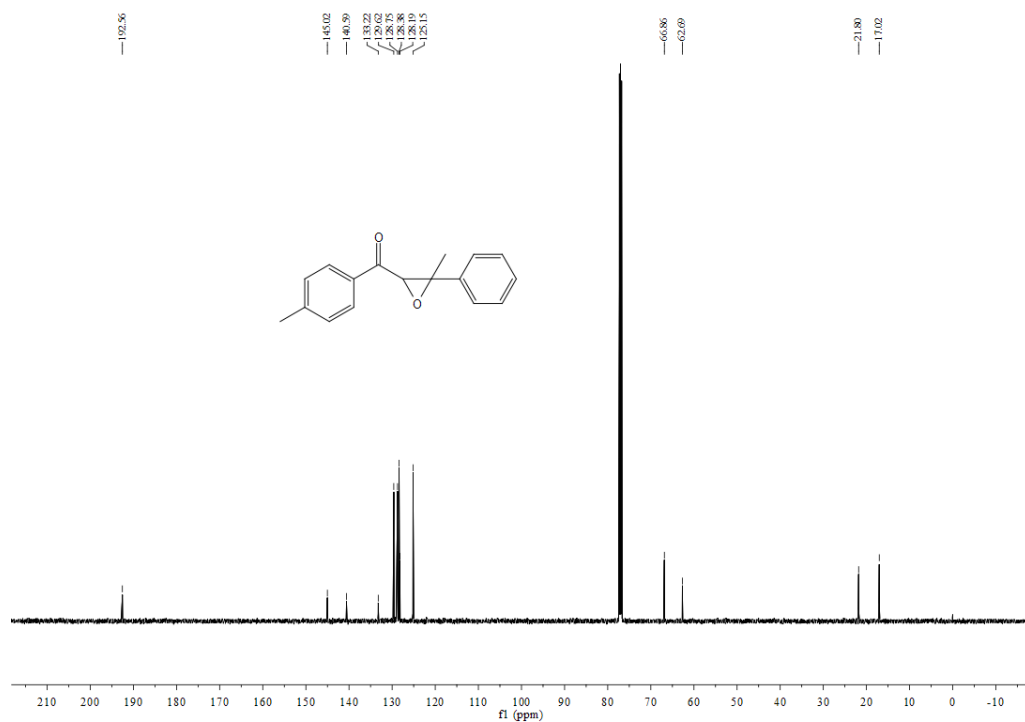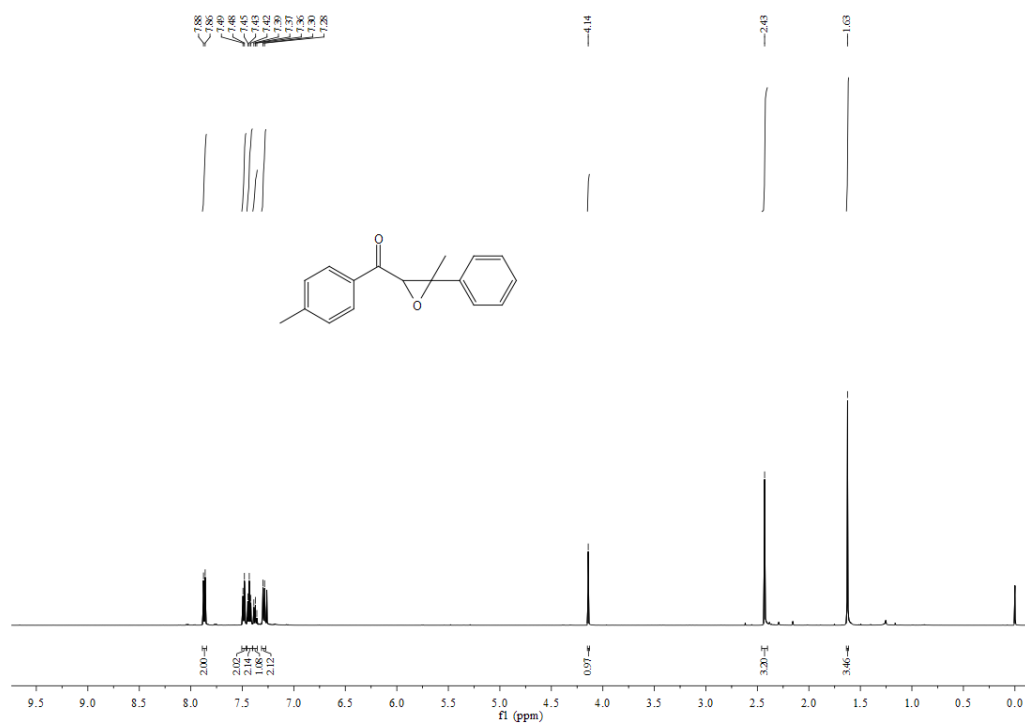

**(10) (4-chlorophenyl)(3-phenyloxiran-2-yl)methanone**

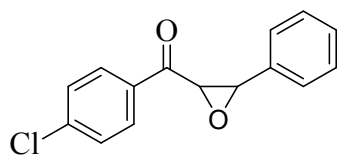

**$^{13}\text{C}$  NMR** (125 MHz,  $\text{CDCl}_3$ )  $\delta$  192.09 (s), 135.27 (s), 133.73 (s), 129.83 (s), 129.22 (d,  $J = 12.3$  Hz), 128.83 (s), 125.79 (s), 61.11 (s), 59.38 (s).  **$^1\text{H}$  NMR** (500 MHz,  $\text{CDCl}_3$ )  $\delta$  7.97 (d,  $J = 7.6$  Hz, 2H), 7.47 (d,  $J = 7.6$  Hz, 2H), 7.44 – 7.34 (m, 5H), 4.23 (d, 1H), 4.08 (d, 1H).

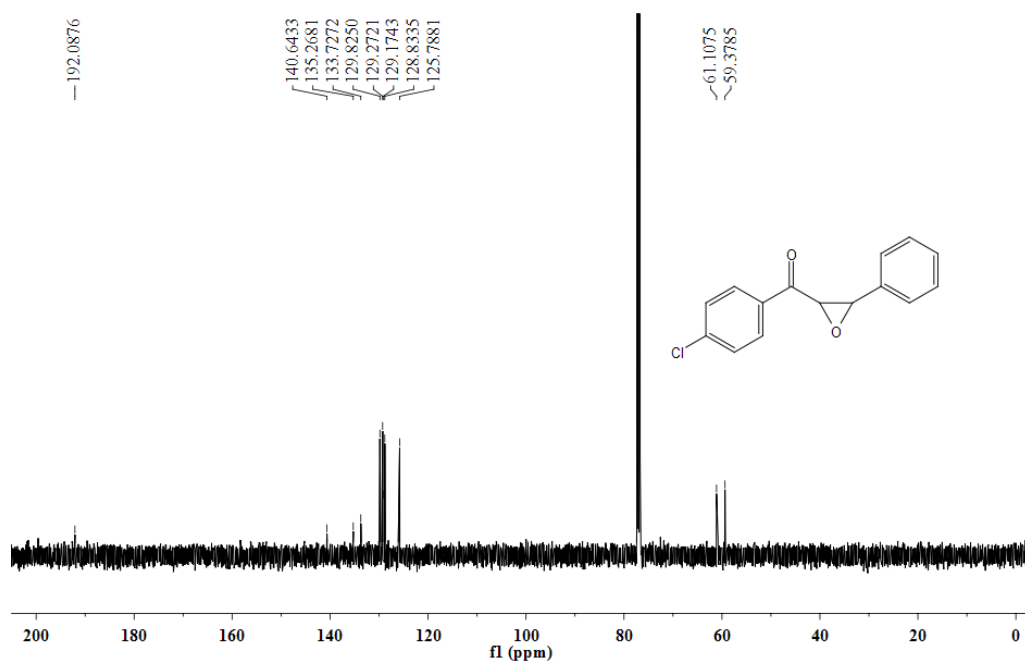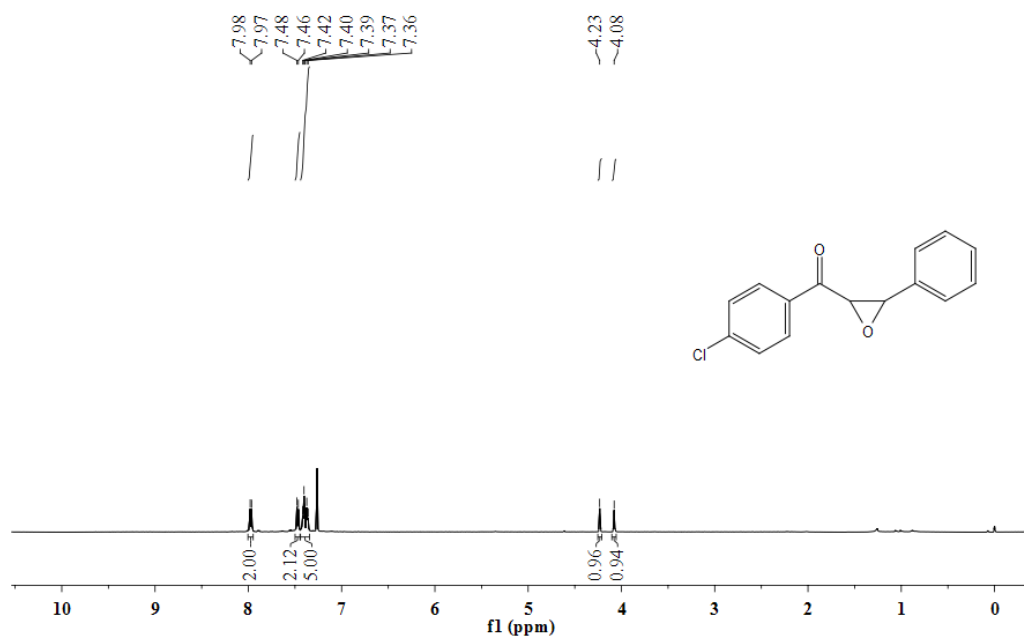

**(11) (4-bromophenyl)(3-phenyloxiran-2-yl)methanone**

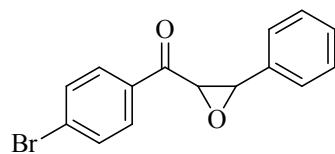

$^{13}\text{C}$  NMR (125 MHz,  $\text{CDCl}_3$ )  $\delta$  192.31 (s), 135.24 (s), 134.10 (s), 132.27 (s), 129.89 (s), 129.43 (s), 129.20 (s), 128.85 (s), 125.80 (s), 61.08 (s), 59.42 (s).  $^1\text{H}$  NMR (500 MHz,  $\text{CDCl}_3$ )  $\delta$  7.89 (d, 1H), 7.64 (d, 1H), 7.44 – 7.38 (m, 1H), 7.37 (dt,  $J = 4.8, 2.9$  Hz, 1H), 4.23 (d,  $J = 1.8$  Hz, 1H), 4.07 (d,  $J = 1.8$  Hz, 1H).

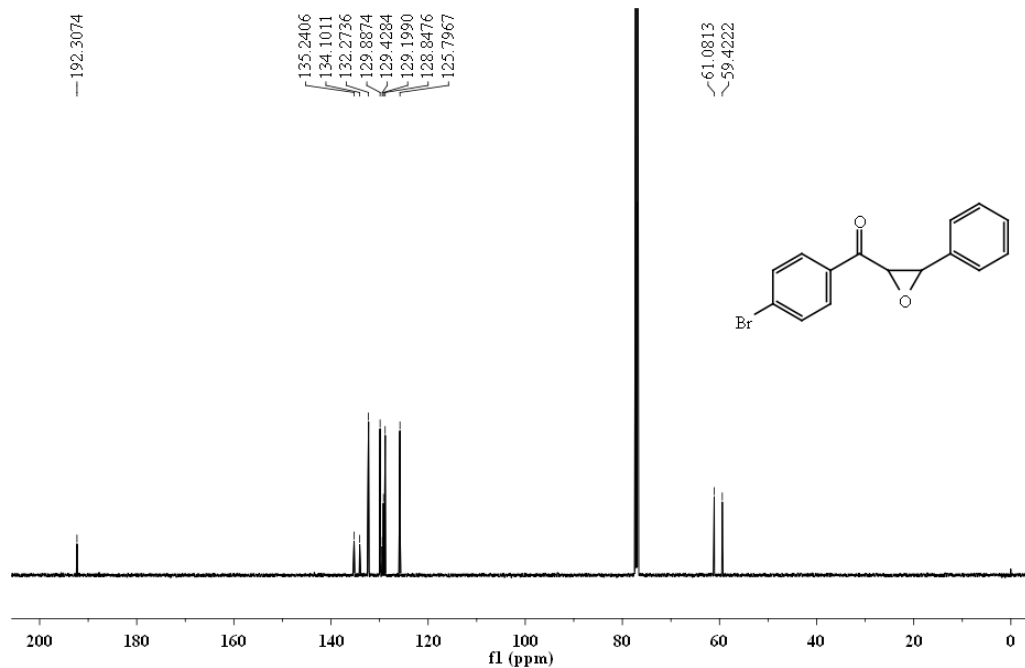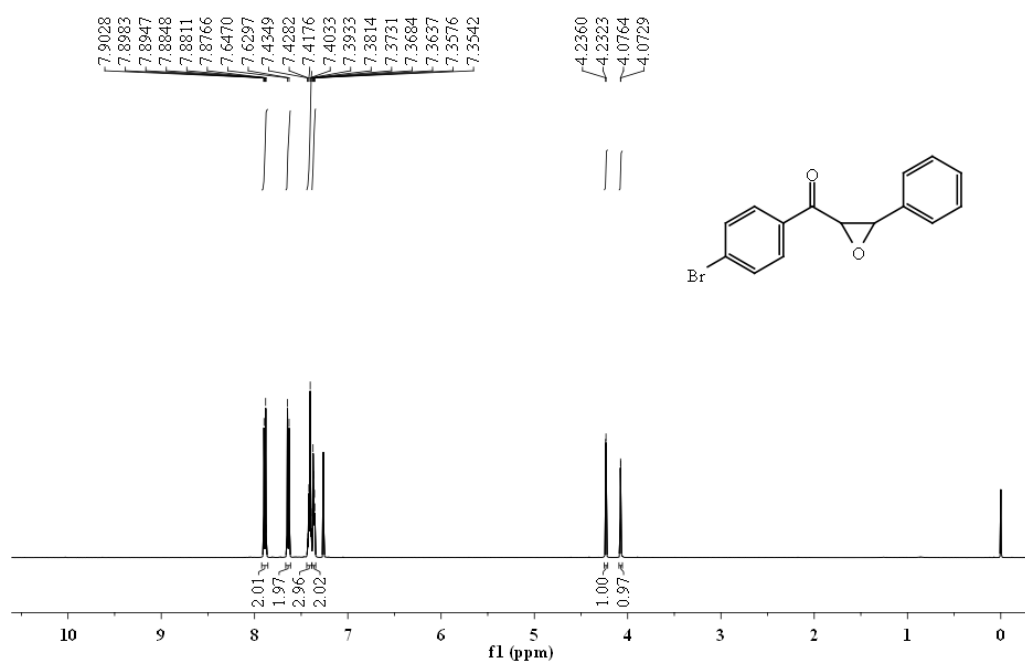

**(12) (4-methoxyphenyl)(3-phenyloxiran-2-yl)methanone**

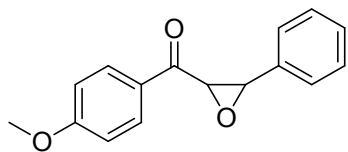

**$^{13}\text{C}$  NMR** (125 MHz,  $\text{CDCl}_3$ )  $\delta$  191.36 (s), 164.26 (s), 135.75 (s), 130.78 (s), 128.95 (s), 128.70 (d,  $J = 10.2$  Hz), 125.80 (s), 114.12 (s), 60.91 (s), 59.15 (s), 55.55 (s).  **$^1\text{H}$  NMR** (500 MHz,  $\text{CDCl}_3$ )  $\delta$  8.02 (d,  $J = 9.0$  Hz, 2H), 7.44 – 7.33 (m, 5H), 6.96 (d,  $J = 9.0$  Hz, 2H), 4.25 (d,  $J = 1.9$  Hz, 1H), 4.07 (d,  $J = 1.8$  Hz, 1H), 3.88 (s, 3H).

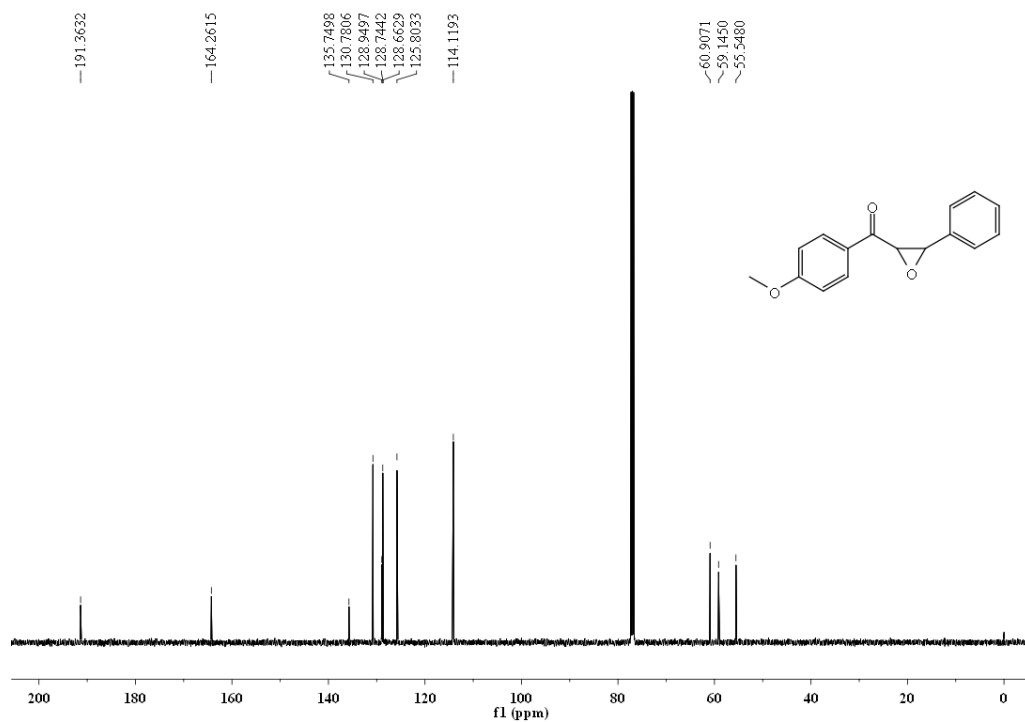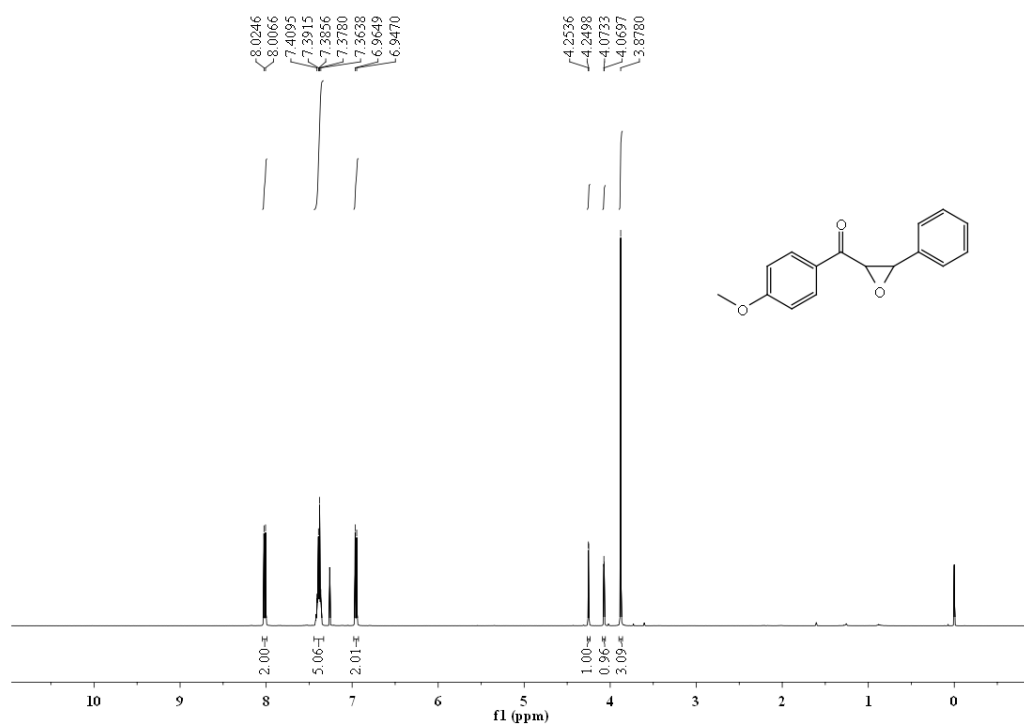

**(13) (4-ethylphenyl)(3-phenyloxiran-2-yl)methanone**

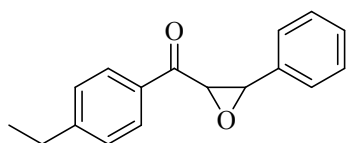

**$^{13}\text{C}$  NMR** (125 MHz,  $\text{CDCl}_3$ )  $\delta$  192.63 (s), 151.20 (s), 135.67 (s), 133.29 (s), 128.99 (s), 128.76 (s), 128.62 (s), 128.40 (s), 125.81 (s), 61.00 (s), 59.29 (s), 29.06 (s), 15.09 (s).  **$^1\text{H}$  NMR** (500 MHz,  $\text{CDCl}_3$ )  $\delta$  7.95 (d,  $J = 8.3$  Hz, 2H), 7.45 – 7.34 (m, 5H), 7.31 (d,  $J = 8.3$  Hz, 2H), 4.28 (d,  $J = 1.9$  Hz, 1H), 4.07 (d,  $J = 1.8$  Hz, 1H), 2.72 (q,  $J = 7.6$  Hz, 2H), 1.26 (t,  $J = 7.6$  Hz, 3H).

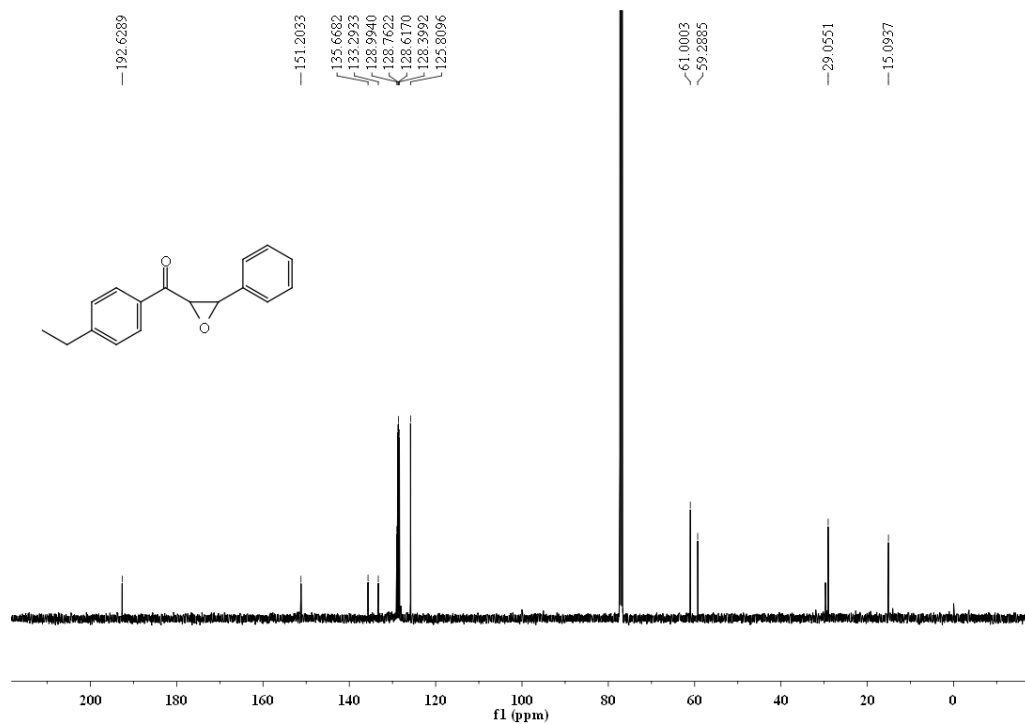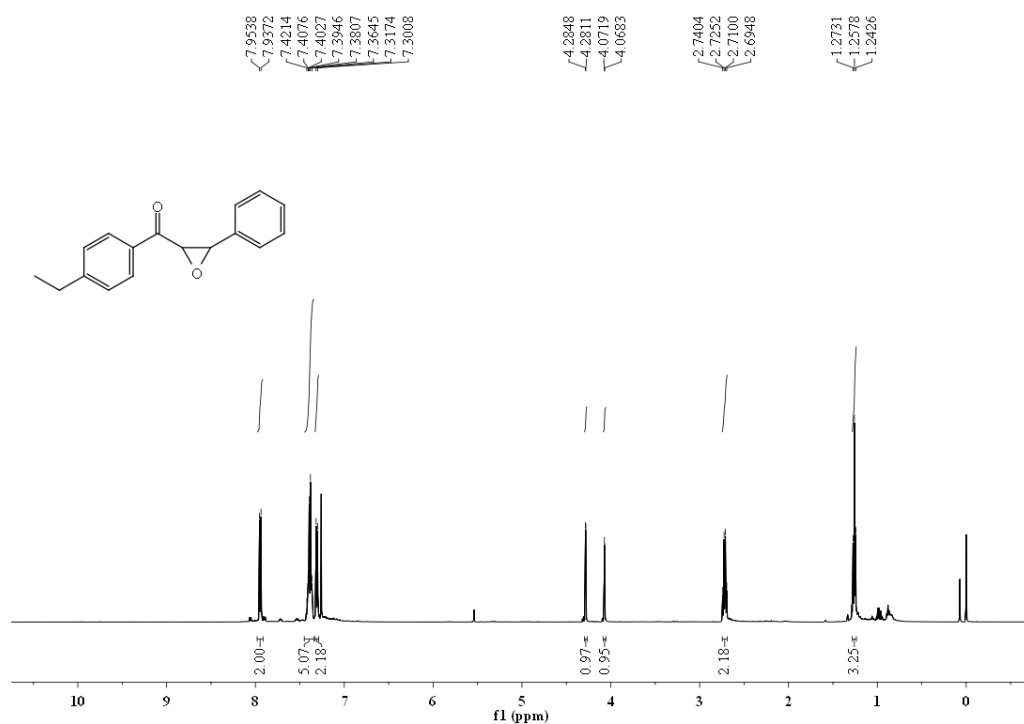

Chemical structure: O=C1C(c2ccccc2)OC1C(=O)c3ccc(C(F)F)cc3

<sup>13</sup>C NMR spectrum (ppm):

- 192.99
- 137.05
- 136.26
- 129.31
- 129.25
- 129.20
- 128.86
- 128.80
- 125.80
- 61.41
- 61.36
- 59.65
- 59.46

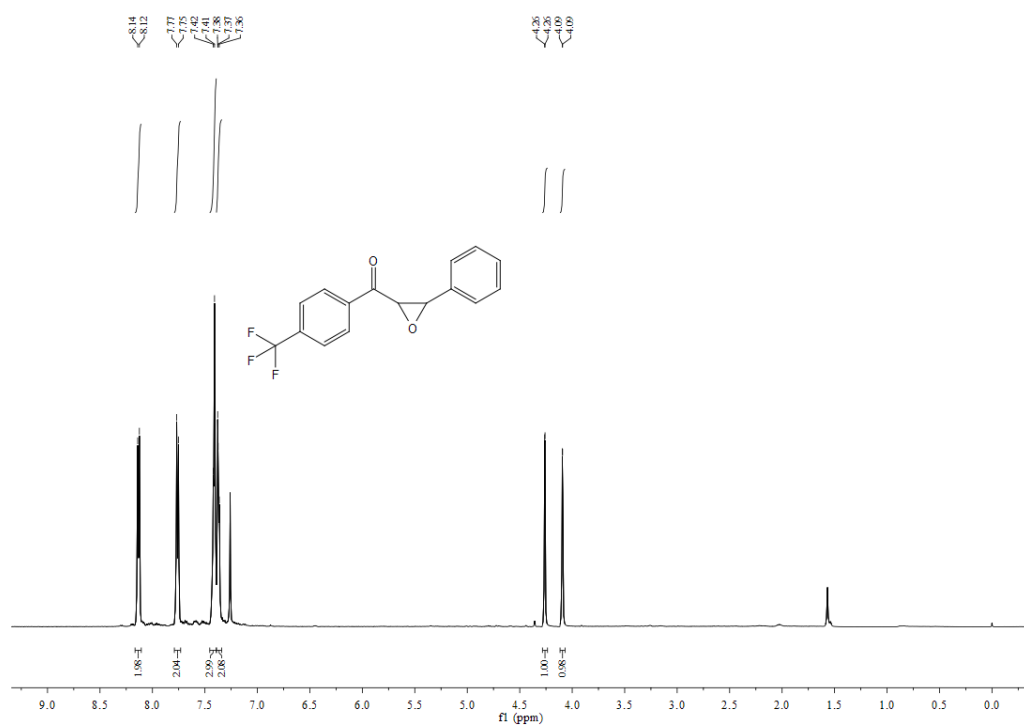



**(15) phenyl(3-phenyloxiran-2-yl)methanone**

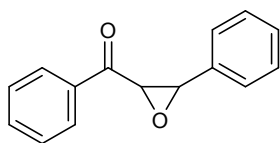

**$^{13}\text{C}$  NMR** (125 MHz,  $\text{CDCl}_3$ )  $\delta$  193.10 (s), 135.54 (s), 133.97 (s), 129.06 (s), 128.84 (d,  $J = 12.5$  Hz), 128.38 (s), 125.81 (s), 61.06 (s), 59.36 (s).  **$^1\text{H}$  NMR** (500 MHz,  $\text{CDCl}_3$ )  $\delta$  8.01 (d,  $J = 7.2$  Hz, 2H), 7.62 (t,  $J = 8.1$  Hz, 1H), 7.49 (t,  $J = 7.8$  Hz, 2H), 7.42 – 7.36 (m, 5H), 4.30 (d,  $J = 1.9$  Hz, 1H), 4.08 (d,  $J = 1.8$  Hz, 1H).

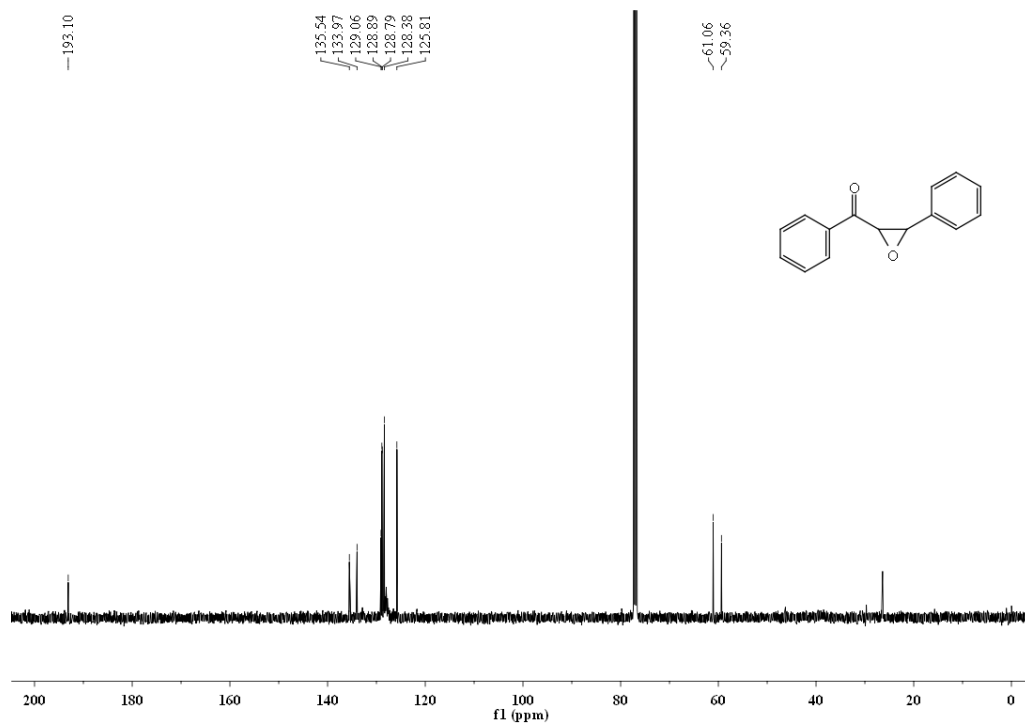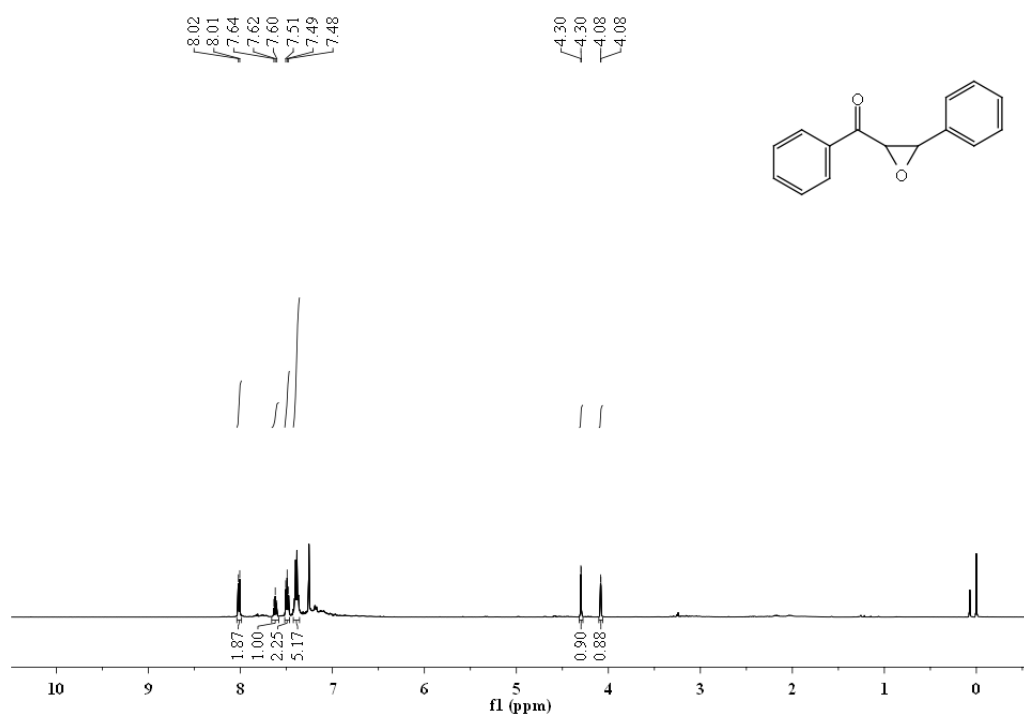

**(16) (2-methoxyphenyl)(3-phenyloxiran-2-yl)methanone**

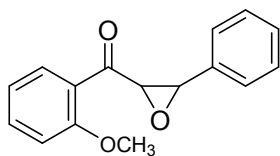

**$^{13}\text{C}$  NMR** (125 MHz,  $\text{CDCl}_3$ )  $\delta$  194.86 (s), 159.57 (s), 136.53 (s), 134.83 (s), 130.71 (s), 128.61 (d,  $J = 15.1$  Hz), 126.06 (s), 125.79 (s), 121.05 (s), 111.57 (s), 64.49 (s), 59.79 (s), 55.59 (s).  **$^1\text{H}$  NMR** (500 MHz,  $\text{CDCl}_3$ )  $\delta$  7.83 (dd,  $J = 7.7, 1.6$  Hz, 1H), 7.57 – 7.49 (m, 1H), 7.44 – 7.33 (m, 5H), 7.05 (t,  $J = 7.5$  Hz, 1H), 6.93 (d,  $J = 8.4$  Hz, 1H), 4.31 (d,  $J = 1.8$  Hz, 1H), 4.01 (d,  $J = 1.7$  Hz, 1H), 3.60 (s, 3H).

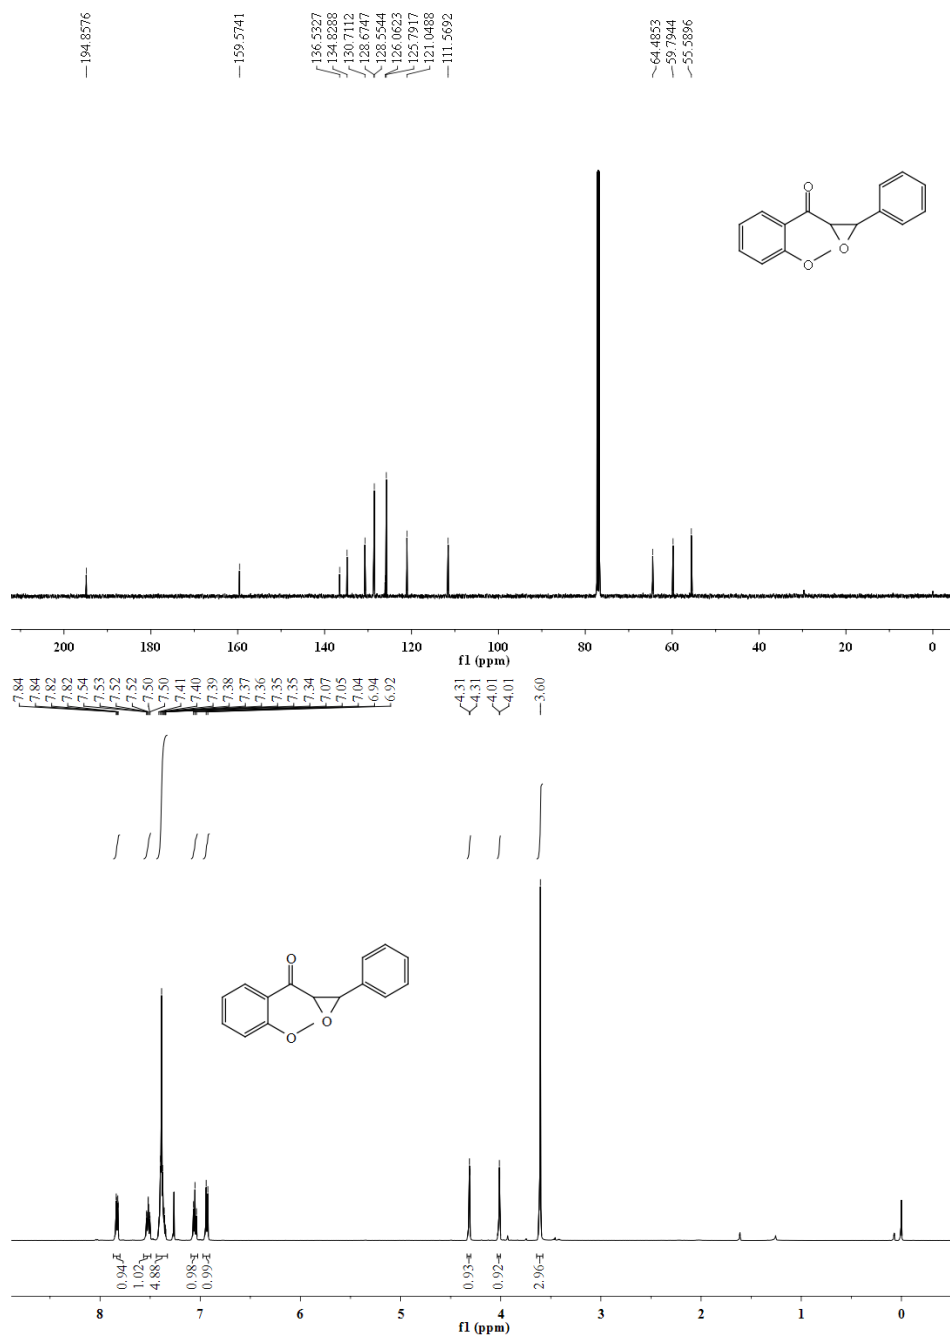

**(17) (3-methoxyphenyl)(3-phenyloxiran-2-yl)methanone**

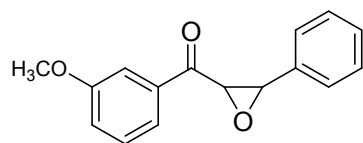

$^{13}\text{C}$  NMR (125 MHz,  $\text{CDCl}_3$ )  $\delta$  192.91 (s), 160.05 (s), 136.82 (s), 135.51 (s), 129.89 (s), 129.06 (s), 128.78 (s), 125.80 (s), 121.01 (s), 120.60 (s), 112.49 (s), 61.06 (s), 59.43 (s), 55.52 (s).  $^1\text{H}$  NMR (500 MHz,  $\text{CDCl}_3$ )  $\delta$  7.58 (d,  $J = 7.7$  Hz, 1H), 7.53 (t, 1H), 7.44 – 7.34 (m, 6H), 7.16 (dd,  $J = 8.3, 1.9$  Hz, 1H), 4.28 (d,  $J = 1.9$  Hz, 1H), 4.07 (d,  $J = 1.8$  Hz, 1H), 3.85 (s, 3H).

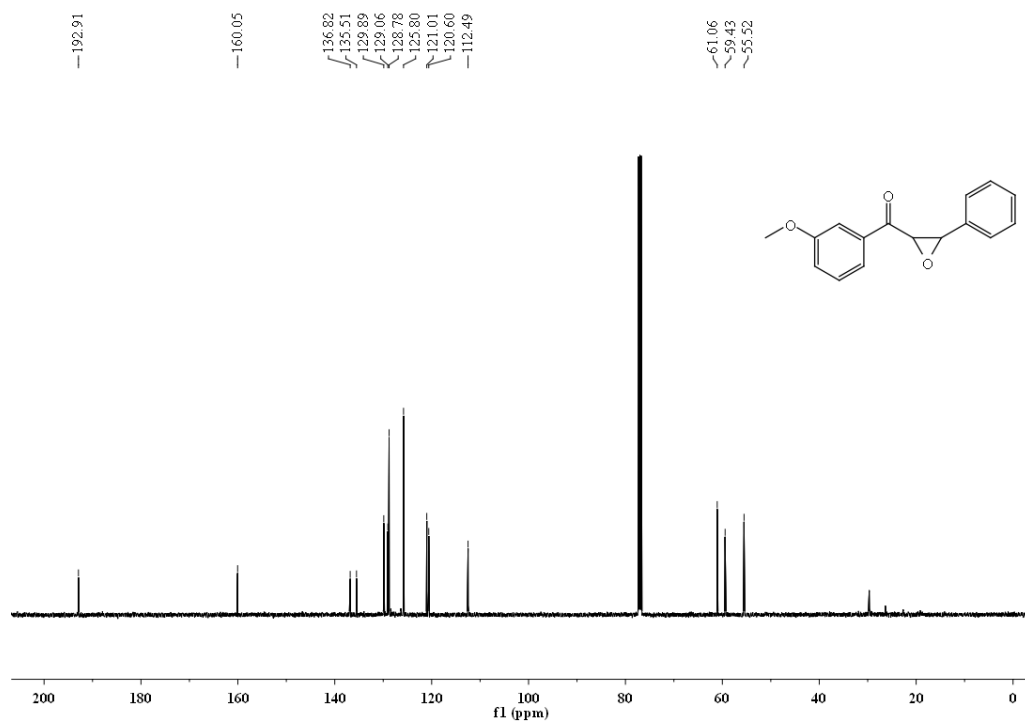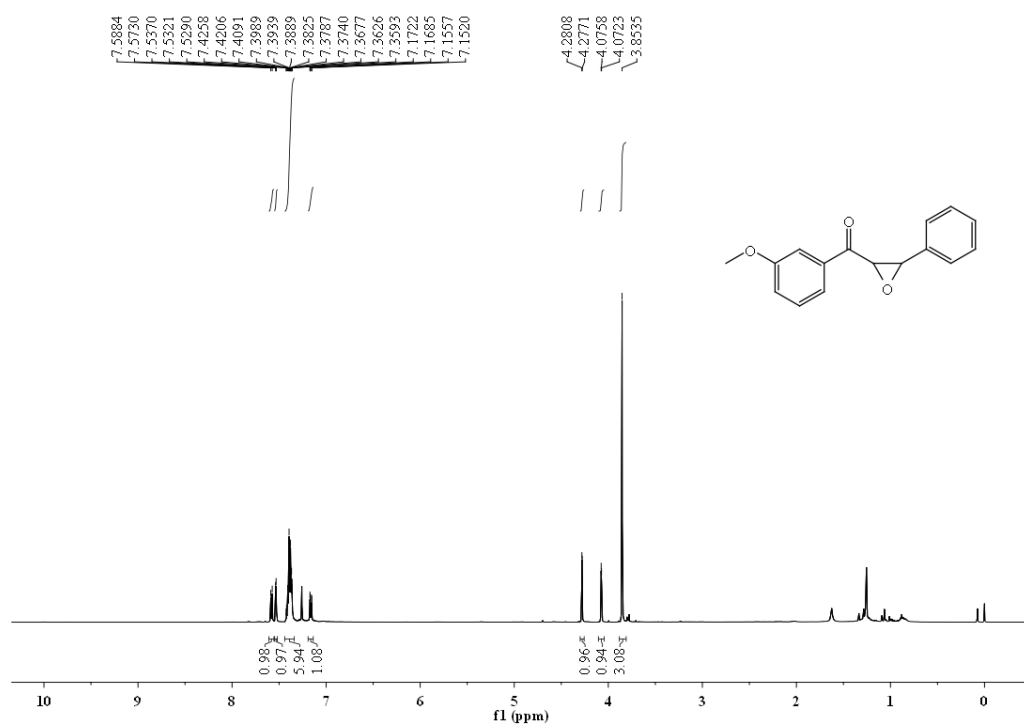

**(18) 1-(3-phenyloxiran-2-yl)hexan-1-one**

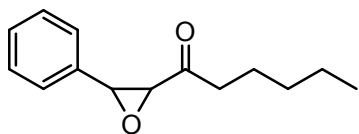

**$^{13}\text{C}$  NMR** (125 MHz,  $\text{CDCl}_3$ )  $\delta$  206.15 (s), 135.27 (s), 128.99 (s), 128.76 – 128.60 (m), 125.71 (s), 63.17 (s), 58.04 (s), 37.79 (s), 31.33 (s), 22.84 (s), 22.42 (s), 13.90 (s).  **$^1\text{H}$  NMR** (500 MHz,  $\text{CDCl}_3$ )  $\delta$  7.36 (s, 3H), 7.29 (d,  $J = 2.3$  Hz, 2H), 3.97 (d,  $J = 1.8$  Hz, 1H), 3.52 (d,  $J = 1.8$  Hz, 1H), 2.59 – 2.38 (m, 2H), 1.68 – 1.60 (m, 2H), 1.32 (d,  $J = 3.8$  Hz, 4H), 0.91 (t,  $J = 7.0$  Hz, 3H).

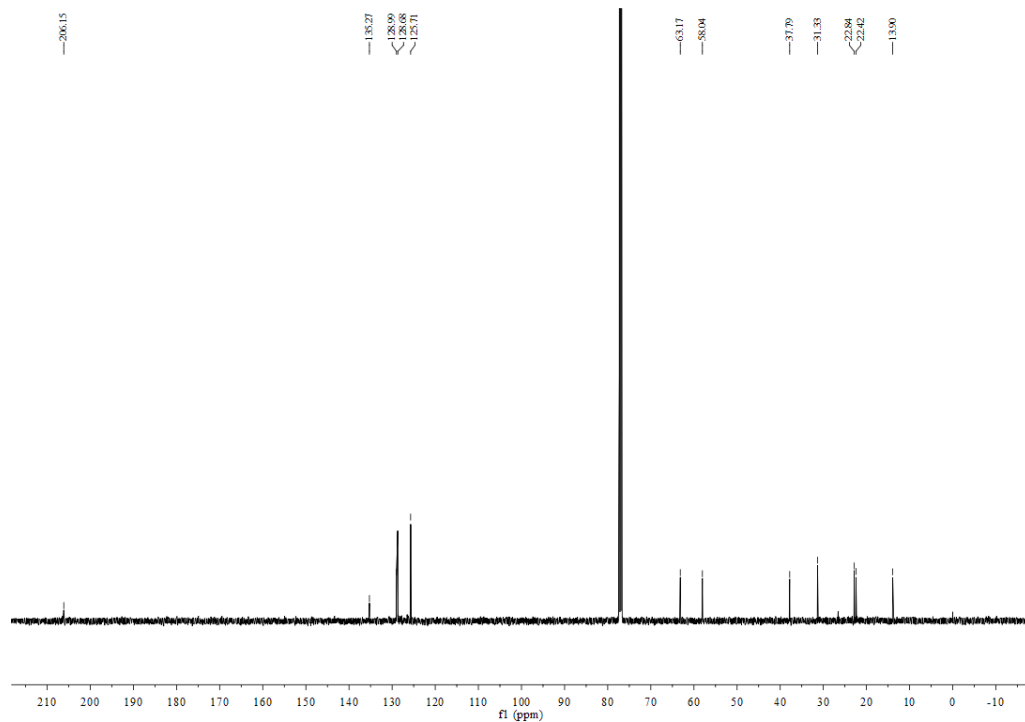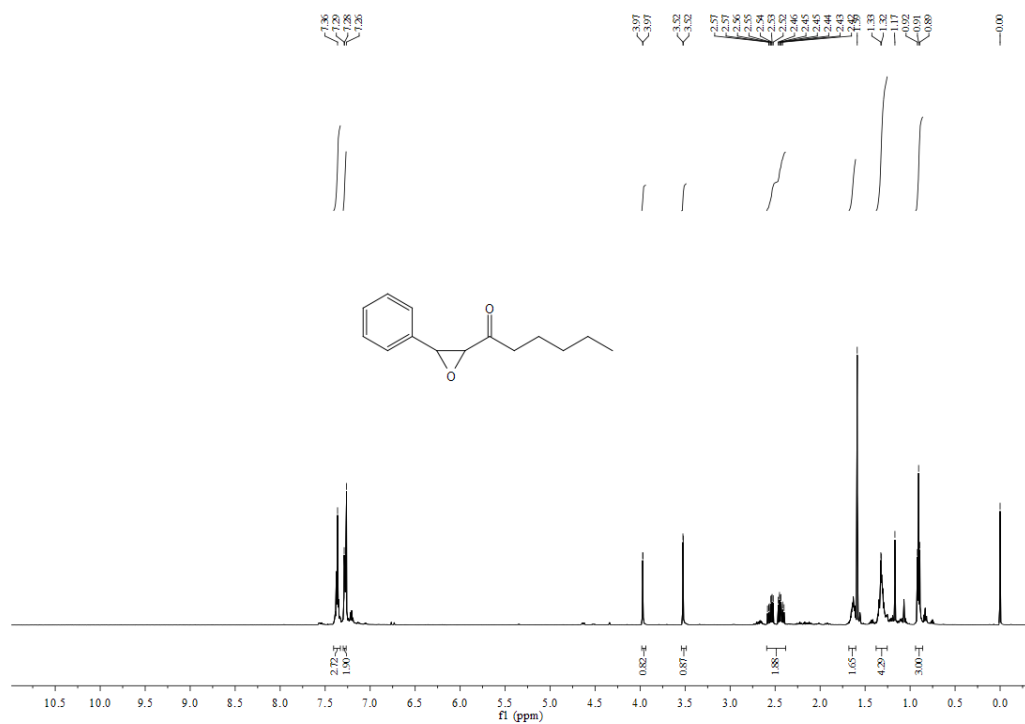

**(19) 2,2,6,6-tetramethylpiperidin-1-yl 4-methylbenzoate**

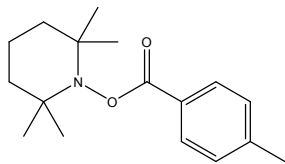

**$^{13}\text{C}$  NMR** (125 MHz,  $\text{CDCl}_3$ )  $\delta$  166.47 (s), 143.51 (s), 129.62 (s), 129.16 (s), 126.95 (s), 60.37 (s), 39.07 (s), 31.98 (s), 21.67 (s), 20.87 (s), 17.04 (s).  **$^1\text{H}$  NMR** (500 MHz,  $\text{CDCl}_3$ )  $\delta$  7.97 (d,  $J = 8.2$  Hz, 2H), 7.26 (d,  $J = 7.2$  Hz, 2H), 2.42 (s, 3H), 1.75 (s, 2H), 1.57 (s, 4H), 1.27 (s, 6H), 1.11 (s, 6H).

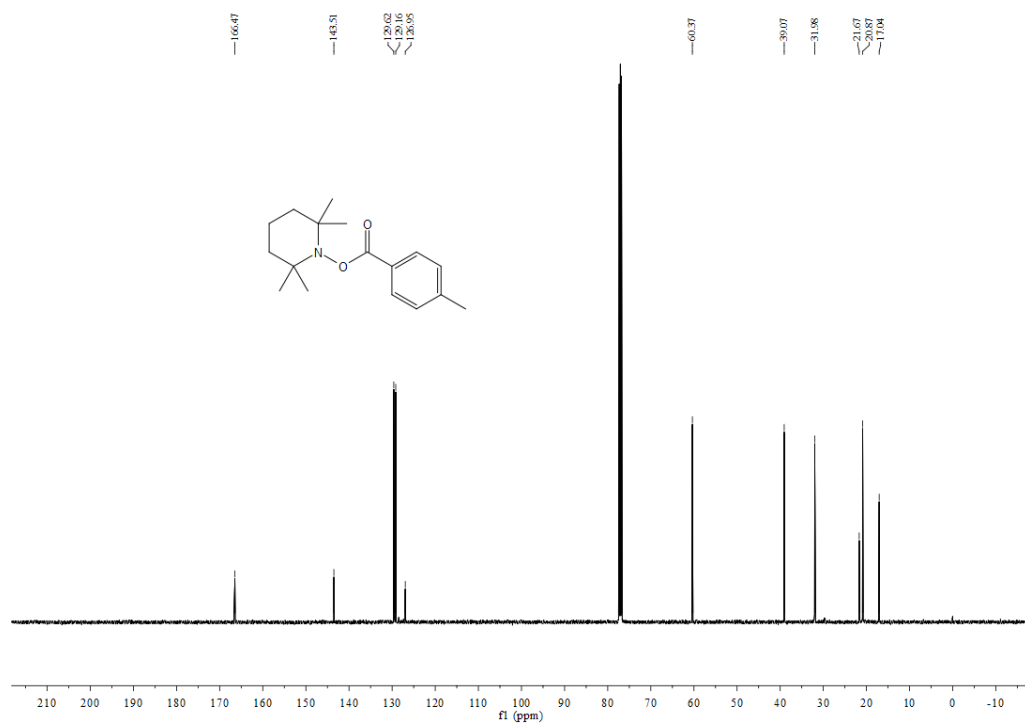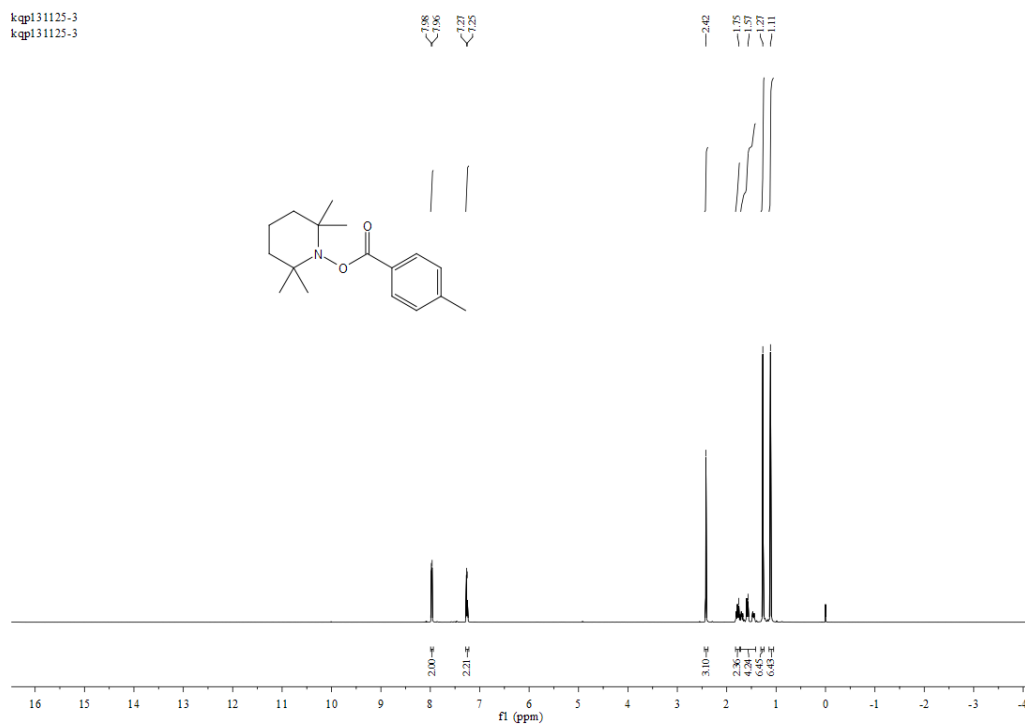

Supplement: c4cc09260k1.pdf [file c4cc09260k1.pdf]
